# Supplementary material for: A facile approach to synthesize CdS–attapulgite as a photocatalyst for reduction reactions in water
Source: Royal Society of Chemistry journal article supplement (doi:10.1039/d1ra04530j), 2021-01-01
Supplement: d1ra04530j1.pdf [file d1ra04530j1.pdf]

## Electronic Supplementary Information

### A facile approach to synthesize CdS-attapulgite as a photocatalyst for reduction reaction in water

Ruixiao Ma,<sup>ab</sup> Liyan Xie,<sup>b</sup> Yixuan Huang,<sup>a</sup> Kangji Zhuo,<sup>a</sup> Juan Xu<sup>a</sup> and Yanhui Zhang<sup>\*ab</sup>

<sup>a</sup> College of Chemistry, Chemical Engineering and Environment, Fujian Province Key Laboratory of Morden Analytical Science and Separation Technology, Minnan Normal University, Zhangzhou, 363000, P.R. China

<sup>b</sup> Fujian Province Key Laboratory of Ecology-Toxicological Effect & Control for Emerging Contaminants, Putian University, Putian, 351100, P.R. China

\*To whom correspondence should be addressed. E-mail Address: [zhangyh@mnnu.edu.cn](mailto:zhangyh@mnnu.edu.cn)

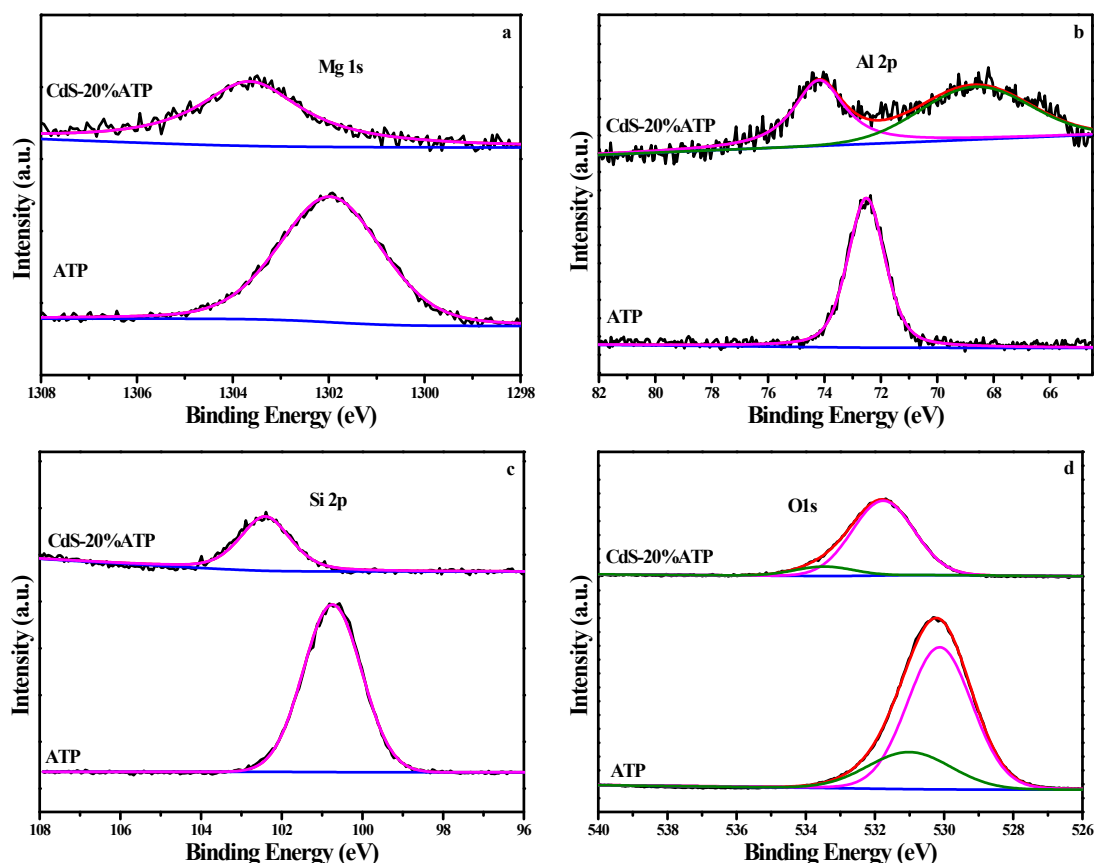

**Fig. S1** Mg 1s (a), Al 2p (b), Si 2p (c) and O 1s (d) XPS spectra of CdS-20%ATP and ATP.

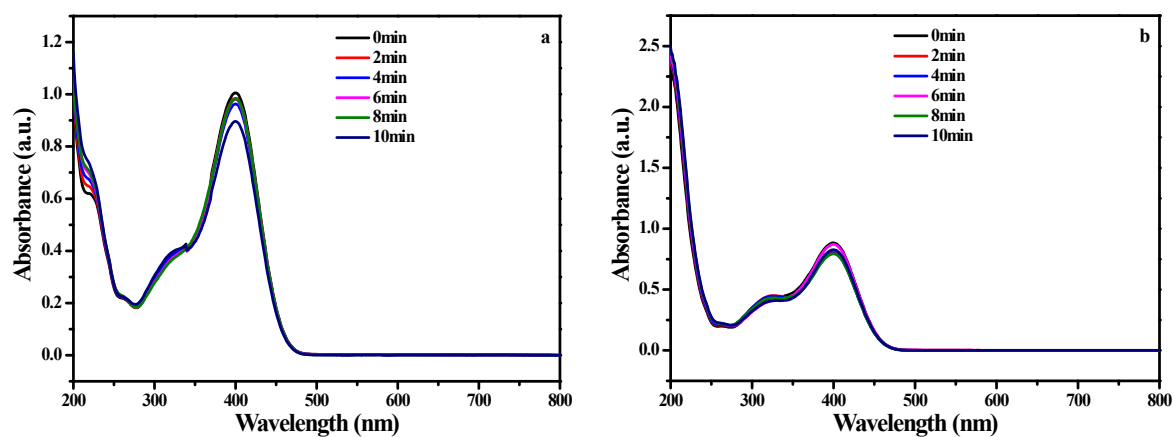

**Fig. S2** The UV-visible absorption spectra of *p*-NP without ammonium formate by blank-CdS (a) and CdS-20%ATP (b).

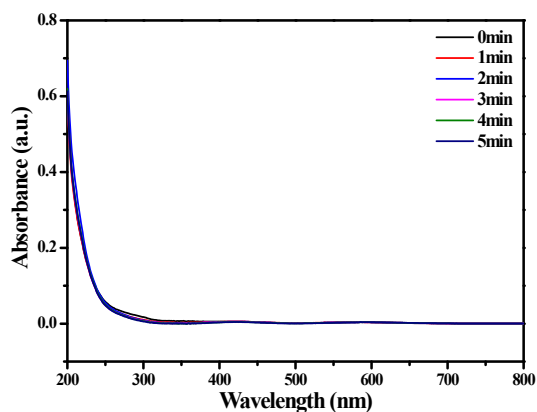

**Fig. S3** The UV-visible absorption spectra of Cr(VI) when pH=3 with CdS-20%ATP as catalyst.

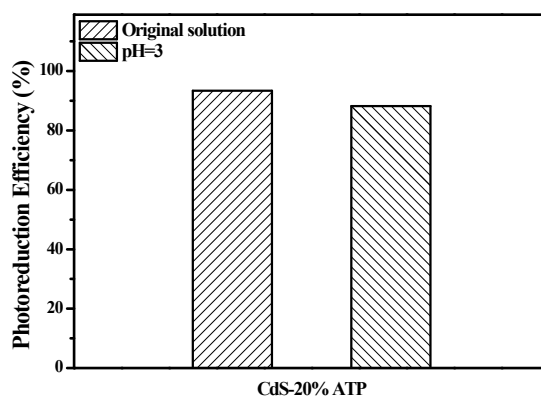

**Fig. S4** The photocatalytic reduction of *p*-NP with CdS-20%ATP.

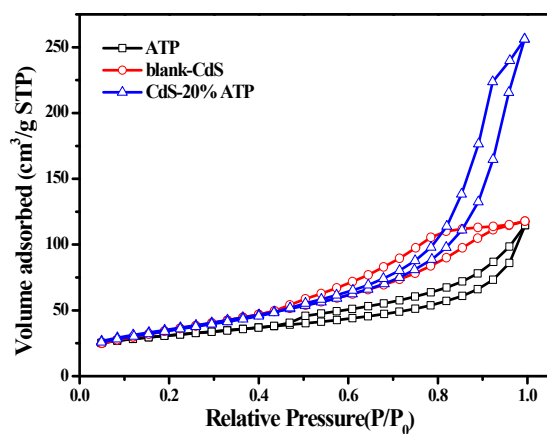

**Fig. S5** N<sub>2</sub> adsorption-desorption isotherms of the ATP, blank-CdS, and CdS-20%ATP.

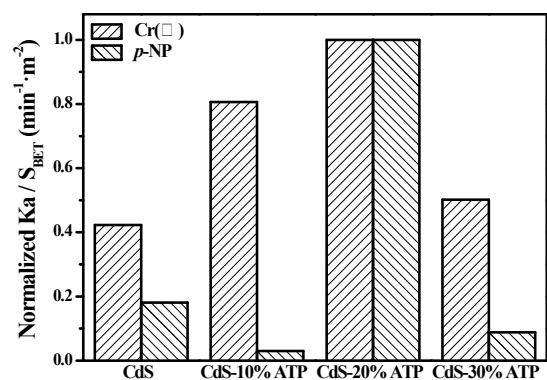

**Fig. S6** The image of normalized  $K_a/S_{BET}$  of the blank-CdS, CdS-10%ATP, CdS-20%ATP and CdS-30%ATP.

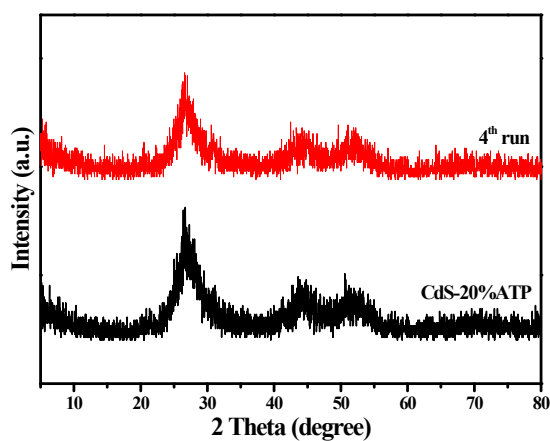

**Fig. S7** XRD patterns of CdS-20%ATP 4<sup>th</sup> run.
